# Supplementary material for: A decennial review of psychotraumatology: what did we learn and where are we going?
Source: PubMed Central journal article supplement — Eur J Psychotraumatol. 2019 Nov 20;10(1):1672948. doi: 10.1080/20008198.2019.1672948 (PMC6924542; doi:10.1080/20008198.2019.1672948), 2019-11-20
Supplement: ZEPT_A_1672948_SM7660.pdf [file ZEPT_A_1672948_SM7660.pdf]

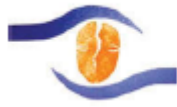

The following articles form the special collection associated with this Editorial.

Akiki, T. J., Averill, L. A., & Abdallah, C. G. (2018). Neurobiological studies of trauma-related psychopathology: A public health perspective. *European Journal of Psychotraumatology*, 9(1). doi:10.1080/20008198.2018.1556554

Armour, C., Fried, E. I., & Olf, M. (2017). PTSD symptomics: Network analyses in the field of psychotraumatology. [Editorial]. *European Journal of Psychotraumatology*, 8(sup3). doi:10.1080/20008198.2017.1398003.

Ashwick, R., Turgoose, D., & Murphy, D. (2019) Exploring the acceptability of delivering Cognitive Processing Therapy (CPT) to UK veterans with PTSD over Skype: A qualitative study. *European Journal of Psychotraumatology*, 10(1). doi:10.1080/20008198.2019.1573128.

Asselbergs, J., Sijbrandij, M., Hoogendoorn, E., Cuijpers, P., Olie, L., Oved, K., ... Riper, H. (2018) Development and testing of TraumaGameplay: An iterative experimental approach using the trauma film paradigm, *European Journal of Psychotraumatology*, 9(1). doi:10.1080/20008198.2018.1424447.

Birkeland, M. S., Nielsen, M. B., Hansen, M. B., Knardahl, S., & Heir, T. (2017). Like a bridge over troubled water? A longitudinal study of general social support, colleague support, and leader support as recovery factors after a traumatic event. *European Journal of Psychotraumatology*, 8(1). doi:10.1080/20008198.2017.1302692.

Bourla, A., Mouchabac, S., El Hage, W., & Ferreri, F. (2018) e-PTSD: An overview on how new technologies can improve prediction and assessment of Posttraumatic Stress Disorder (PTSD), *European Journal of Psychotraumatology*, 9(1). doi:10.1080/20008198.2018.1424448.

Bui, E., Hellberg, S. N., Hoepfner, S. S., Rosencrans, P., Young, A., Ross, R. A., ... Simon, N. M. (2019). Circulating levels of oxytocin may be elevated in complicated grief: A pilot study. *European Journal of Psychotraumatology*, 10(1). doi: 10.1080/20008198.2019.1646603

Cloitre, M. (2015). The "one size fits all" approach to trauma treatment: Should we be satisfied? *European Journal of Psychotraumatology*, 6. doi:10.3402/ejpt.v6.27344

Comtesse, H., & Rosner, R. (2019). Prolonged grief disorder among asylum seekers in Germany: The influence of losses and residence status. *European Journal of Psychotraumatology*, 10. doi:10.1080/20008198.2019.1591330

Greinacher, A., Derezza-Greeven, C., Herzog, W., & Nikendei, C. (2019). Secondary traumatization in first responders: A systematic review. *European Journal of Psychotraumatology*, 10. doi:10.1080/20008198.2018.1562840

Hall, B. J., Xiong, Y. X., Yip, P. S., Lao, C. K., Shi, W., Sou, E. K., ... Lam, A. I. (2019). The association between disaster exposure and media use on post-traumatic stress disorder following Typhoon Hato in Macao, China. *European Journal of Psychotraumatology*, 10(1), doi:10.1080/20008198.2018.1558709.

Hansen, M., Hyland, P., Armour, C., Shevlin, M., & Elklit, A. (2015). Less is more? Assessing the validity of the ICD-11 model of PTSD across multiple trauma samples. *European Journal of Psychotraumatology*, 6(1). doi: [10.3402/ejpt.v6.28766](https://doi.org/10.3402/ejpt.v6.28766)

Hansen, M., & Olf, M. (2018). Child maltreatment across the lifespan. *European Journal of Psychotraumatology*, 7. doi: [10.1080/2008198.2018.1483165](https://doi.org/10.1080/2008198.2018.1483165)

Kelmendi, B., Adams, T. G., Yarnell, S., Southwick, S., Abdallah, C. G., & Krystal, J. H. (2016). PTSD: From neurobiology to pharmacological treatments. *European Journal of Psychotraumatology*, 7. doi:[10.3402/ejpt.v7.31858](https://doi.org/10.3402/ejpt.v7.31858).

Kessler, R. C., Aguilar-Gaxiola, S., Alonso, J., Benjet, C., Bromet, E. J., Cardoso, G., ... Koenen, K. C. (2017). Trauma and PTSD in the WHO world mental health surveys. *European Journal of Psychotraumatology*, 8(sup5). doi:[10.1080/20008198.2017.1353383](https://doi.org/10.1080/20008198.2017.1353383).

Knaevelsrud, C., Stammel, N., & Olf, M. (2017). Traumatized refugees: Identifying needs and facing challenges for mental health care. *European Journal of Psychotraumatology*, 8(Suppl 2). doi:[10.1080/20008198.2017.1388103](https://doi.org/10.1080/20008198.2017.1388103)

Lanius, R. A., Frewen, P. A., Tursich, M., Jetly, R., & McKinnon, M. C. (2015). Restoring large-scale brain networks in PTSD and related disorders: A proposal for neuroscientifically-informed treatment interventions. *European Journal of Psychotraumatology*, 6. doi:[10.3402/ejpt.v6.27313](https://doi.org/10.3402/ejpt.v6.27313).

Lanius, R. A., & Olf, M. (2017). The neurobiology of PTSD. *European Journal of Psychotraumatology*, 8(1), doi:[10.1080/20008198.2017.1314165](https://doi.org/10.1080/20008198.2017.1314165)

Lely, J. C. G., Smid, G. E., Jongedijk, R. A., Knipscheer, J. W., & Kleber, R. J. (2019). The effectiveness of narrative exposure therapy: A review, meta-analysis and meta-regression analysis. *European Journal of Psychotraumatology*, 10. doi:[10.1080/20008198.2018.1550344](https://doi.org/10.1080/20008198.2018.1550344)

Nijdam, M. J., & Vermetten, E. (2018). Moving forward in treatment of posttraumatic stress disorder: Innovations to exposure-based therapy. *European Journal of Psychotraumatology*, 9(1). doi:[10.1080/20008198.2018.1458568](https://doi.org/10.1080/20008198.2018.1458568).

Purić, D., & Vukčević Marković, M. (2019). Development and validation of the Stressful Experiences in Transit Questionnaire (SET-Q) and its Short Form (SET-SF). *European Journal of Psychotraumatology*, 10(1). doi:[10.1080/20008198.2019.1611091](https://doi.org/10.1080/20008198.2019.1611091)

Rizzo, A., & Shilling, R. (2017) Clinical virtual reality tools to advance the prevention, assessment, and treatment of PTSD, *European Journal of Psychotraumatology*, 8(5), doi:[10.1080/20008198.2017.1414560](https://doi.org/10.1080/20008198.2017.1414560)

Sheerin, C. M., Stratton, K. J., Amstadter, A. B., & McDonald, S. D. (2018). Exploring resilience models in a sample of combat-exposed military service members and veterans: A comparison and commentary. *European Journal of Psychotraumatology*, 9 (1). doi:[10.1080/20008198.2018.1486121](https://doi.org/10.1080/20008198.2018.1486121).

Simon, N., Roberts, N. P., Lewis, C. E., van Gelderen, M. J., & Bisson, J. I. (2019). Associations between perceived social support, posttraumatic stress disorder (PTSD) and complex PTSD (CPTSD): Implications for treatment. *European Journal of Psychotraumatology*, 10(1). doi:[10.1080/20008198.2019.1573129](https://doi.org/10.1080/20008198.2019.1573129).

Sopp, M. R., Brueckner, A. H., Schäfer, S. K., Lass-Hennemann, J., & Michael, T. (2019). Differential effects of sleep on explicit and implicit memory for potential trauma reminders: Findings from an analogue study. *European Journal of Psychotraumatology*, 10, 1.

Thoresen, S., Aakvaag, H. F., Wentzel-Larsen, T., Dyb, G., & Hjemdal, O. K. (2012). The day Norway cried: Proximity and distress in Norwegian citizens following the 22nd July 2011 terrorist attacks in Oslo and on Utøya Island. *European Journal of Psychotraumatology*, 3. doi:[10.3402/ejpt.v3i0.19709](https://doi.org/10.3402/ejpt.v3i0.19709).

van de Schoot, R., Schalken, N., & Olf, M. (2017). Systematic search of Bayesian statistics in the field of psychotraumatology. *European Journal of Psychotraumatology*, 8(1). doi:[10.1080/20008198.2017.1375339](https://doi.org/10.1080/20008198.2017.1375339)

van der Kolk, B., Ford, J. D., & Spinazzola, J. (2019). Comorbidity of developmental trauma disorder (DTD) and post-traumatic stress disorder: Findings from the DTD field trial. *European Journal of Psychotraumatology*, 10(1). doi:[10.1080/20008198.2018.1562841](https://doi.org/10.1080/20008198.2018.1562841).

Van Woudenberg, C., Voorendonk, E. M., Bongaerts, H., Zoet, H. A., Verhagen, M., Lee, C. W., ... De Jongh, A. (2018) Effectiveness of an intensive treatment programme combining prolonged exposure and eye movement desensitization and reprocessing for severe post-traumatic stress disorder. *European Journal of Psychotraumatology*, 9, 1487225, doi:[10.1080/20008198.2018.1487225](https://doi.org/10.1080/20008198.2018.1487225).
